# Supplementary material for: Associations of Individual and Joint Expressions of ERCC6 and ERCC8 with Clinicopathological Parameters and Prognosis of Gastric Cancer
Source: Research Square preprint supplement (doi:10.21203/rs.3.rs-117489/v2), 2021-02-04
Supplement: Supplementary file 1 [file 52a7e4423b3de91067820de6.xlsx]

## Sheet: Table 3 (2)
Table 2. Correlation between ERCC6/ERCC8 expression and survival in gastric cancer
	Case	Cases of Events	MST	Univariate			Multivariate
				P	HR	95%CI	P	HR	95%CI
ERCC6 expression
Positive	31	3	37.4		1(ref)			1(ref)
Negative	66	22	31.1	0.047	3.416	1.017-11.475	0.284	2.034	0.556-7.444
ERCC8 expression
Positive	40	9	35.9		1(ref)			1(ref)
Negative	57	16	31.2	0.211	1.69	0.742-3.848	0.958	1.023	0.429-2.442
ERCC6-8 expression
DP	16	3	36.2		1(ref)			1(ref)
DN and SN	81	22	32.5	0.286	1.942	0.573-6.579	0.759	1.221	0.340-4.394
ERCC6-8 expression
DP and SP	55	9	37.1		1(ref)			1(ref)
DN	42	16	28.8	0.022	2.603	1.148-5.905	0.478	1.38	0.567-3.364
GC, gastric cancer MST median survival time; HR: hazard radio; CI: confidence interval ref. reference

## Sheet: Table 3
Table 3. Correlation between ERCC6/ERCC8 expression and survival in gastric cancer
	Case	Cases of Events	MST		Univariate				Multivariate
					P	HR	95%CI		P	HR	95%CI
ERCC6 expression
Positive	31	3	37.4			1(ref)				1(ref)
Negative	66	22	31.1		0.047	3.416	1.017-11.475		0.284	2.034	0.556-7.444
ERCC8 expression
Positive	40	9	35.9			1(ref)				1(ref)
Negative	57	16	31.2		0.211	1.69	0.742-3.848		0.958	1.023	0.429-2.442
ERCC6-8 expression
DP	16	3	36.2			1(ref)				1(ref)
DN and SN	81	22	32.5		0.286	1.942	0.573-6.579		0.759	1.221	0.340-4.394
ERCC6-8 expression
DP and SP	55	9	37.1			1(ref)				1(ref)
DN	42	16	28.8		0.022	2.603	1.148-5.905		0.478	1.38	0.567-3.364
GC, gastric cancer MST median survival time; HR: hazard radio; CI: confidence interval ref. reference
